# Supplementary material for: Washing Reagents for Remediating Heavy-Metal-Contaminated Soil: A Review
Source: Frontiers journal article supplement (doi:10.3389/feart.2022.901570), 2022-06-01
Supplement: Table_1.docx [file Table_1.docx]

Table S1. Laboratory and field investigations on washing remediation of common used washing reagents, together with the recommendation index of heavy-metal removal ability, eco-friendliness and cost effectiveness.

| **Reagents** | | | **Removal efficiency of heavy metals (%)** | | | | | | | | **References** | **Metals removal ability** | **Eco-**  **friendliness** | **Cost effectiveness** |
| --- | --- | --- | --- | --- | --- | --- | --- | --- | --- | --- | --- | --- | --- | --- |
| **Cd** | **Cr** | **Cu** | **Ni** | **Pb** | **Zn** | **Hg** | **As** |
| Inorganic  reagents | Acids | HCl | 95.5 [c] | 80.8 [c] | 79.3 [c]; 41-51 [d]; 93.7 [e] | 77 [f] | 88.7 [c]; 35-83 [d];  43.5 [e] | 98 [c]; 65-97 [d] | 93 [a]; 15.2 [b] | 83.7 [a]; 64-92 [d]; 39.3 [e]; | [a] Alghanmi et al., 2016; [b] Lin, 2009; [c] Liu et al., 2010; [d] Moutsatsou et al., 2005; [e] Oh et al., 2015 | ☆☆☆ | ☆ | ☆☆☆ |
| H2SO4 | 81.9 [d] | 42 [b] | 38-68 [b]; 30 [c] | 42 [a]; 25 [b] | 6 [c]; <5.4 [d] | 58 [a]; 53 [b]; 78 [c] | / | 70 [a]; 80 [c] | [a] Ko et al., 2005; [b] Lin et al., 2012; [c] Moutsatsou, 2005; [d] Zhang, 2013 | ☆☆☆ | ☆ | ☆☆☆ |
| HNO3 | 76.6 [a] | / | 56.1 [b] | 36.5 [b] | 96.9 [b] | 73.7 [b] | 13.8 [a]; 0 [c] | 41 [b] | [a] Lin, 2009;  [b] Oh et al., 2015; [c] Subires-Munoz et al., 2011 | ☆☆☆ | ☆ | ☆☆☆ |
| H3PO4 | 70 [d] | 69.9 [b] | / | 45 [a] | 59 [e] | 61 [a] | 18.9 [c] | 75 [a]; 23 [d] | [a] Ko et al., 2006; [b] Li et al., 2011; [c] Lin, 2009; [d] Wei et al., 2016; [e] Yang and Mosby, 2006 | ☆☆ | ☆☆ | ☆☆ |
| Alkali | NaOH | / | / | / | / | 1 [d] | 67 [c]; 18 [d] | 37.5 [b] | 90 [a]; 86.3 [d] | 1. [Jang](https://www.sciencedirect.com/science/article/pii/S0045653505000251" \l "!) et al., 2005; [b] Lin, 2009; 2. Moon et al., 2012; [c] Yang et al., 2009 | ☆  (As ☆☆☆) | ☆ | ☆☆ |
| Salts | FeCl3 | 25.6 [a],  62.9 [c]; 88.3 [d] | 10 [b] | 63.4 [b]; 16.7 [c]; 70 [d] | 37.9 [b] | 22.8 [b]; 52.1 [c]; 78.7 [d] | 17.5 [b]; 30 [c]; 58.2 [d] | / | / | [a] Makino et al., 2006; [b] Yang et al., 2016; [c] Zhai et al., 2018: [d] Chen and Wu, 2018 | ☆☆ | ☆☆ | ☆☆ |
| CaCl2 | 19 [b]; 10 [c] | 5 [c] | 14 [c] | 15 [c] | 8 [c] | / | 9.4 [a] | / | [a] Lin, 2009; [b] Makino et al., 2006; [c] Yang et al, 2014 | ☆☆ | ☆☆ | ☆☆☆ |
| [Chelating](../AppData/Local/youdao/dict/Application/8.7.0.0/resultui/html/index.html" \l "/javascript:;)  re[agent](../AppData/Local/youdao/dict/Application/8.7.0.0/resultui/html/index.html" \l "/javascript:;)s | Aminopolycarboxylic acids | EDTA | 76.3 [a]; 79.5 [b]; 66.8 [c]; 92 [e]; 96 [f]; 70 [g] | 72.5 [c]; 10 [e] | 92 [a]; 75.2 [b];  90 [e]; 94 [f] | 21.3 [a] | 40.4 [a]; 86.7 [b]; 89 [e]; 99.6 [f]; 79 [g] | 46.8 [a]; 51.1 [b]; 87 [f]; 38 [g] | 28.6 [d]; 17 [f] | 80 [g] | [a] Begum et al., 2012; [b] Chen and Wu, 2018; [c] Gitipour et al., 2016; [d] Lin, 2009; [e] Ramamurthy and Schalchian, 2013; [f] Wasay et al., 2001; [g] Voglar and Lestan, 2012 | ☆☆☆ | ☆☆ | ☆ |
| DTPA | 98 [a] | / | 90 [a] | / | 92 [a]; 5 [c] | 85 [a] | 23.1 [b] | / | [a] Wasay et al., 2001; [b] Lin, 2009; [c] Neilson et al., 2003 | ☆☆ | ☆☆ | ☆ |
| EDDS | 52 [a]; 22.5 [d] | 16.3[b] | 67.3 [a]; | 17.6 [a]; | 21.8 [a]; 83.7 [d] | 26.9 [a]; 42.5 [d] | / | 89.9 [c]  (pH>10) | [a] Begum et al., 2012; [b] Li et al., 2011; [c] Li and Pan, 2015; [d] Wang et al., 2016 | ☆☆ | ☆☆☆ | ☆ |
| IDSA | 46 [a]; 91 [b] | / | 62.8 [a]; 46-91 [b] | 18.4 [a]; 28-80 [b] | 7.8 [a]; 65-95 [b] | 25.4 [a] | / | / | [a] Begum et al., 2012; [b] Mohamed et al., 2013 | ☆☆ | ☆☆☆ | ☆ |
| GLDA | 61.9 [a]; 60.5 [d]; 95 [c] | 0.9 [b] | 60.6 [a]; 47.6 [b]; 90 [c] | 18.4 [a] | 14.7 [a]; 88.6 [d]; 83 [c] | 30.1 [a]; 81 [c]; 38.1 [d] | / | 7.3 [b] | [a] Begum et al., 2012; [b] Hartley et al., 2014; [c] Jiao, 2017; [d] Wang et al., 2016 | ☆☆ | ☆☆☆ | ☆ |
| NTA | 42.4 [c] | / | 54.3 [c]; 38-88 [b] | 23-80 [b] | 41.6 [c]; 70-94 [b] | 9.9 [c] | / | 94.1 [a] | [a] Li and Pan, 2015; [b] Mohamed et al., 2013; [c] Yang et al., 2019 | ☆☆ | ☆☆ | ☆ |
| Natural low molecular organic acids | Citric acid | 65.4 [a]; 59.5 [g] | 25.7 [b]; 35.1 [d]; 58.8 [g] | 54.1 [a]; 26.3 [b]; | 33 [b] | 35[a]; 7.9[b] | 59.1 [a]; 21.6 [b] | 0.08 [c]; 30.3 [d] | 88.7 [f] (pH<3) | [a] Chen and Wu, 2018; [b] Gan et al., 2012; [c] Jia et al., 2018; [d] Jiang et al., 2012; [e] Li et al., 2011; [f] Li and Pan, 2015; [g] Tao, 2013 | ☆☆ | ☆☆☆ | ☆☆ |
| Oxalic | 70 [d]; 12 [e] | 24.8 [a]; 47 [e]; 10.2 [f] | 55.1 [a]; 2.8 [f] | 47.5 [a];  9.8 [f] | 7.3 [a]  13.6 [f] | 29.3 [a]; 2.5 [f] | 27.3 [b] | 3.7-60.5 [c]; 22 [d] | [a] Gan et al., 2012; [b] Jiang et al., 2012; [c] Lee et al., 2017; [d] Wei et al., 2016; [e] Tao, 2013; [f] Yang et al., 2016 | ☆☆ | ☆☆☆ | ☆☆ |
| [Tartaric](../AppData/Local/youdao/dict/Application/8.7.0.0/resultui/html/index.html" \l "/javascript:;) | 46 [d]; 19.9 [e] | 33 [d] | 30.2 [e] | 28.3 [e] | 16.4 [e] | 26.6 [e] | 0.07 [a]; 22.4 [b] | 15 [c] | [a] Jia et al., 2018; [b] Lin, 2009; [c] Liu et al., 2014; [c] Tao, 2013; [d] Wuana et al., 2010 | ☆☆ | ☆☆☆ | ☆☆ |
| Acetic | 70.6 [a]; 58-100 [c] | 0.9 [b]; 6-27 [c] | 4.8 [b]; 1-14 [c] | 23.3 [a]; 12.6 [b]; 6-62 [c] | 42.2-100 [a]; 3.3 [b];  55-100 [c] | 8.1 [b]; 44-100 [c] | 1 [c] | 5 [c] | [a] Gzar et al., 2014; [b] Gan et al., 2012; [c] Reddy et al., 2010 | ☆☆ | ☆☆☆ | ☆☆ |
| [Surfactant](../AppData/Local/youdao/dict/Application/8.7.0.0/resultui/html/index.html" \l "/javascript:;)s | Synthetic surfactants | SDBS | 30.1 [a] | 75.1 [a]; 17.6 [b] | / | / | / | / | / | / | [a] Chen and Fu, 2012; [b] Li et al., 2011 | ☆ | ☆ | ☆ |
| SDS | 75.8 [a]; 48 [c]; 50 [d] | 29.8 [a]; 10.2 [e] | 19 [c]; 15 [d]; 2.8 [e] | 9.8 [e] | 13 [c]; 12 [d]; 13.6 [e] | 2.5 [e] | 0.06 [b] | / | [a] Chen and Fu, 2012; [b] Jia et al., 2018; [c] Ramamurthy and Schalchian, 2013; [d] Yang et al., 2016 | ☆ | ☆ | ☆ |
| Tween | 37.1 | 61.2 | / | / | / | / | / | / | Chen and Fu, 2012 | ☆ | ☆ | ☆ |
| Triton X-100 | 3 [b]; 52.8 [c] | / | 6 [b] | 45.2 [c] | 2 [b] | / | 32.8 [a] | / | [a] Lin, 2009; [b] Ramamurthy and Schalchian, 2013; [c] Wang and Mulligan, 2004 | ☆ | ☆ | ☆ |
| Biosurfactants | Rhamnolipids | 92 [a]; 53.8 [b]; 61.7 [c] | 92 [a] | 88 [a]; 63.2 [b]; | 78 [a]; 51 [c]; | 88 [a]; 23.1 [b] | 44.7 [b] | / | 34.4 [b] | [a] Juwarkar et al., 2007; [b] Li et al., 2015; [c] Wang and Mulligan, 2004 | ☆☆ | ☆☆☆ | ☆ |
| Cyclodextrin | 28 [c] | 11.5 [a]; 20 [c] | / | 13.4 [c] | 14.2 [b]; 40 [c] | / | / |  | [a] Li et al., 2011; [b] Neilson et al., 2003; [c] Ye et al., 2015 | ☆☆ | ☆☆☆ | ☆ |
| Sophorolipid | 46 [b]; 79.8 [d] | 18 [b]; 65.4 [c] | 3.3 [a]; 35 [b]; 35.9 [c] | 65.3 [c] | 17 [b]; 32.1 [c]; 30.3 [d] | 48.9 [c] | / | 11.7 [a] | [a] Arab and Mulligan, 2018; [b] Chen et al., 2017; [c] He et al., 2017; [d] Qi et al., 2018 | ☆☆ | ☆☆☆ | ☆ |
| Saponin | 41.6 [c]; 95.1 [e]; 45.6 [f] | 4 [c]; 37.6 [d] | 36 [a]; 43.9 [e];  24.4 [f] | / | 47 [a]; 83.5 [e]; 17.6 [f] | 18 [a]; 20.3 [e]; 19 [f] | / | 22.2 [b] | [a] Maity et al., 2013; [b] Gusiatin, 2014; [c] Tao, 2013; [d] Yan et al., 2015; [e] Zhan et al., 2012; [f] Zhu et al., 2010 | ☆☆ | ☆☆☆ | ☆ |
| Tannic acid | 59. 1 [c] | / | 63 [a] | / | 63 [a] | 48 [a] | / | 38 [b]; 38.2 [c] | [a] Gusiatin, 2014; [b] Gusiatin et al., 2017; [c] Wu et al., 2016 | ☆☆ | ☆ | ☆ |
| Lipopeptid | 44.2 | / | 26.2 | 32.2 | 40.3 | 32.1 | / | / | Singh and Cameotra, 2013 | ☆☆ | ☆☆☆ | ☆ |
| Compound chemical reagents | Dissolved organic matter | | 90.1 [a]; 80 [c]; 86.88 [e] | 23.55 [f] | 72 [b] | 43.84 [e] | 18.6 [a]; 8.7 [b] | 15.2 [a]; 50.5 [b] | / | 30 [d] | [a] Can et al., 2018; [b] Kulikowska et al., 2015; [c] Liu and Chen, 2013; [d] Rashad et al., 2013; [e] Zhang et al., 2019; [f] Zou et al., 2019 | ☆☆ | ☆☆☆ | ☆☆☆ |

Remarks: i) ☆ in the table means the recommendation index, the more ☆, the stronger heavy-metal removal ability, the more eco-friendly, and the more cost effectiveness. ii) the metals removal ability is duduced from the removal efficiency of heavy mteals based on laboratory and field investigations. iii) the eco-friendliness is also duduced from the reference studies. iv) the prices of the washing reagents come from internet, for example, http://www.100ppi.com/.

REFERENCES

[Arab](https://link.springer.com/article/10.1007/s11356-018-1770-3" \l "auth-1), F., and Mulligan, C.N. (2018). An eco-friendly method for heavy metal removal from mine tailings. [Environmental Science and Pollution Research](https://link.springer.com/journal/11356), 25, 16202–16216.

Chen, Z., Chen, W., He, F., Qu, Y. (2017). Comparison of biosurfactants for heavy metals washing from river sediment. Journal of Water Resources & Water Engineering 28 (6), 56-61.

Gan, W., He, Y., Zhang, X., Shan, Y., Zheng, L., Lin, Y. (2012). Speciation analysis of heavy metals in soils polluted by electroplating and effect of washing to the removal of the pollutants. Journal of Ecology and Rural Environment 28 (1): 82-87.

Gitipour, S., Ahmadi, S., Madadian, E., Ardestani, M. (2016). Soil washing of chromium-and cadmium-contaminated sludge using acids and ethylenediaminetetra acetic acid chelating agent. Environ Technol. 37(1), 145.

Gusiatin, Z.M. (2014). Tannic acid and saponin for removing arsenic from brownfield soils: mobilization, distribution and speciation. [Journal of Environmental Sciences](https://www.sciencedirect.com/science/journal/10010742" \o "Go to Journal of Environmental Sciences on ScienceDirect) 26(4), 855-864.

Gusiatin, Z.M., Klik, B., and Kulikowska, D. (2017). Tannic acid for remediation of historically As-contaminated soils. Environmental Technology 40(8), 1-27.

Gzar, H.A., Abdul-Hameed, A.S., and Yahya, A.Y. (2014). Extraction of lead, cadmium and nickel from contaminated soil using acetic acid. Open Journal of Soil Science 04(6), 207-214.

He, J., Tang, J., Liu, T. Xin, X. (2017). Removal of heavy metals in the presence of the biodegradable biosurfactant of sophorolipid from the municipal dewatered sludge. Desalination and Water Treatment 89, 225–232.

Jang, M., [Hwang](https://xueshu.baidu.com/s?wd=author:(Jung%20Sung%20Hwang)%20&tn=SE_baiduxueshu_c1gjeupa&ie=utf-8&sc_f_para=sc_hilight=person" \t "https://xueshu.baidu.com/usercenter/paper/_blank), J.S., [Choi](https://xueshu.baidu.com/s?wd=author:(Sang%20Il%20Choi)%20&tn=SE_baiduxueshu_c1gjeupa&ie=utf-8&sc_f_para=sc_hilight=person" \t "https://xueshu.baidu.com/usercenter/paper/_blank), S.I., KwangPark, J. (2005). Remediation of arsenic-contaminated soils and washing effluents. Chemosphere 60(3), 344-354.

Jia, J., Huang, Y., Liu, F., Shi, W., Hou, C., Teng, Y. (2018). Washing remediation of mercury contaminated soil from mercury mining area. Environmental Protection of Chemical Industry 38 (2), 231-235.

Jiang, X., Li, X., Zhang, J., Lu, J., Chang, J., Cui, D. (2012). Study of citric acid extraction and washing from different soil polluted by Cr. Chinese Agricultural Science Bulletin 28 (02), 278-281.

Jiao, W. (2017). New biodegradable chelator GLDA leaching restoration of heavy metal contaminated soil. Changchun: Jilin University.

Juwarkar, A.A., Nair, A., Dubey, K.V., Singh, S.K., Devotta, S. (2007). Biosurfactant technology for remediation of cadmium and lead contaminated soils. Chemosphere 68(10), 1996-2002.

Lee, J.C., Kim, E.J., and Baek, K. (2017). Synergistic effects of the combination of oxalate and ascorbate on arsenic extraction from contaminated soils. Chemosphere 168, 1439-1446.

Li, K., and Pan, G. (2015). Simultaneous removal of harmful algal blooms and microcystins using microorganism- and chitosan-modified local soil. Environ. Sci. Technol. 49 (10), 6249-6256.

Lin, K. 2009. Research on the leaching characteristics of mercury and its remediation by washing of serious polluted soil, a case in Qingzhen, Guizhou province. Doctoral dissertation, [Guizhou University](C:/Users/Administrator/AppData/Local/youdao/dict/Application/8.7.0.0/resultui/html/index.html" \l "/javascript:;).

Liu, L., Hu, S., Chen, H., Li, H. (2010). Feasibility of washing as a remediation technology for the heavy metals-polluted soils left by chemical plant. Chinese Journal of Applied Ecology 21(6), 1537-1541.

Liu, P.Y., Liu, H., Li, Y.J., Dong, C.X. (2014). Remediation of arsenic contaminated soils and treatment of washing effluent using calcined Mn-Fe layered double hydroxide. Advanced Materials Research 955-959, 2014-2021.

Mohamed, M.A., Efligenir, A., Husson, J., Persello, J., Fievet, P., Fatin-Rouge, N. (2013). Extraction of heavy metals from a contaminated soil by reusing chelating reagent solutions. Journal of Environmental Chemical Engineering 1(3), 363–368.

Makino, T., Sugahara, K., Sakurai, Y., Takano, H., Kamiya, T., Sasaki, K. et al. (2006). Remediation of cadmium contamination in paddy soils by washing with chemicals: selection of washing chemicals. Environmental Pollution 144(1), 0-10.

Neilson, J.W., Artiola, J.F., and Maier, R.M. (2003). Characterization of lead removal from contaminated soils by nontoxic soil-washing agents. Journal of Environmental Quality 32(3), 899-908.

Qi, X., Xu, X., Zhong, C., Jiang, T., Wei, W., Song, X. (2018). Removal of cadmium and lead from contaminated soils using sophorolipids from fermentation culture of starmerella bombicola cgmcc 1576 fermentation. International Journal of Environmental Research and Public Health 15(11).

Ramamurthy, A., and Schalchian, H. (2013). Surfactant assisted removal of Cu(II), Cd(II) and Pb(II) from contaminated soils. Environment Protection Engineering 39(3), 87-99.

Rashad, M., Assaad, F.F., and Shalaby, E.A. (2013). Effect of dissolved organic matter derived from waste amendments on the mobility of inorganic arsenic (iii) in the egyptian alluvial soil. International journal of Energy & Environment 4(4), 677-686.

Reddy, K.R., Danda, S., Yukselen-Aksoy, Y., Al-Hamdan, A.Z. (2010). Sequestration of heavy metals in soils from two polluted industrial sites: implications for remediation. Land Contamination & Reclamation 18 (1), 13-23.

Singh, A.K., and Cameotra, S.S. (2013). Efficiency of lipopeptide biosurfactants in removal of petroleum hydrocarbons and heavy metals from contaminated soil. Environmental Science and Pollution Research International 20(10), 7367-7376.

Subires-Munoz, J., Garcia-Rubio, A., Vereda-Alonso, C., Gomez-Lahoz ,C., Rodriguez-Maroto,J., Garcia-Herruzo, F., Paz-Garcia, J. (2011). Feasibility study of the use of different extractant agents in the remediation of a mercury contaminated soil from Almaden. Sep. Sci. Technol. 79, 151–156.

Tao, Y. 2013. The selection of washing reagents for soils polluted by cadmium and chromium. Changsha: [Central](C:/Users/Administrator/AppData/Local/youdao/dict/Application/8.7.0.0/resultui/html/index.html" \l "/javascript:;) [South](C:/Users/Administrator/AppData/Local/youdao/dict/Application/8.7.0.0/resultui/html/index.html" \l "/javascript:;) [University](C:/Users/Administrator/AppData/Local/youdao/dict/Application/8.7.0.0/resultui/html/index.html" \l "/javascript:;).

Wang, S., and Mulligan, C.N. (2004). Rhamnolipid foam enhanced remediation of cadmium and nickel contaminated soil. Water Air & Soil Pollution 157(1-4), 315-330.

Wang, G., Zhang S., Xu X., Zhong Q., Zhang C., et al. (2016). Heavy metal removal by GLDA washing: optimization, redistribution, recycling, and changes in soil fertility. Science of the Total Environment 569, 557-568.

Wu, L., Xian, S., Kong, D., Ou, M., Deng, Q. (2016). Remediation of Cd polluted soil by co-leaching of tannic acid and citric acid. Environmental Engineering (08), 178-181.

Yang, J., and Mosby, D. (2006). Field assessment of treatment efficacy by three methods of phosphoric acid application in lead-contaminated urban soil. Science of the Total Environment 366(1), 136-142.

Yang, X., Bai, L., Deng, L., Chen, T., Pan, C., Fan, H. (2014). [Research on drip washing and rehabilitation of soil in polluted areas of electroplate](https://xueshu.baidu.com/usercenter/paper/show?paperid=0254a666fd9298cb1bfd6b1607efaf40" \t "https://xueshu.baidu.com/usercenter/paper/_blank). [China Environmental Protection Industry](C:/Users/Administrator/AppData/Local/youdao/dict/Application/8.7.0.0/resultui/html/index.html" \l "/javascript:;) (9), 50-52.

Zhan, H., Jiang, Y., Wang, B., Zhu, K., Zhao, B. (2012). Study on removal efficiencies and mechanism of heavy metal from sewage irrigated soils by saponin compared with commonly used washing agents. International Journal of Scientific and Engineering Research 3, 1-9.

Zhang, S. 2013. Study on washing remediation of cadmium, lead contaminated calcareous soil. Doctoral dissertation, Central South University.

Zhang, S.Y., Wen, J., Hu, Y., Fang, Y., Zhang, H. B., Xing, L., et al. (2019). Humic substances from green waste compost: an effective washing agent for heavy metal (Cd, Ni) removal from contaminated sediments. Journal of Hazardous Materials 366, 210-218.

Zhu, Q., Shao, C., Zhang, Z., Wen, X. (2010). Saponin biosurfactant-enhanced flushing for the removal of heavy metals from soils. Acta Scientiae Circumstantiae 30 (12), 2491-2498.
